# Supplementary material
Source: publisher site journal article supplement (https://www.spandidos-publications.com/4135/downloadSupplementary)

Figure S1. Transfection of Hep3B and Huh-7 cells with miR-374c-5p inhibitor. (A and B) Expression of miR-374c-5p was downregulated in (A) Huh-7 and (B) Hep3B cells. \*P<0.05. miR, microRNA.

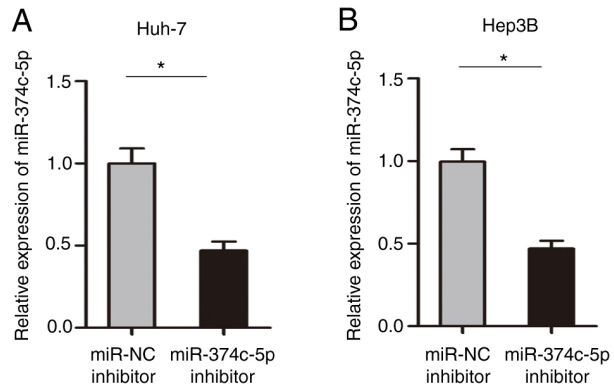

Figure S2. miR-374c-5p is overexpressed in Huh-7 cells.  
\*\*\*P<0.001. miR, microRNA.

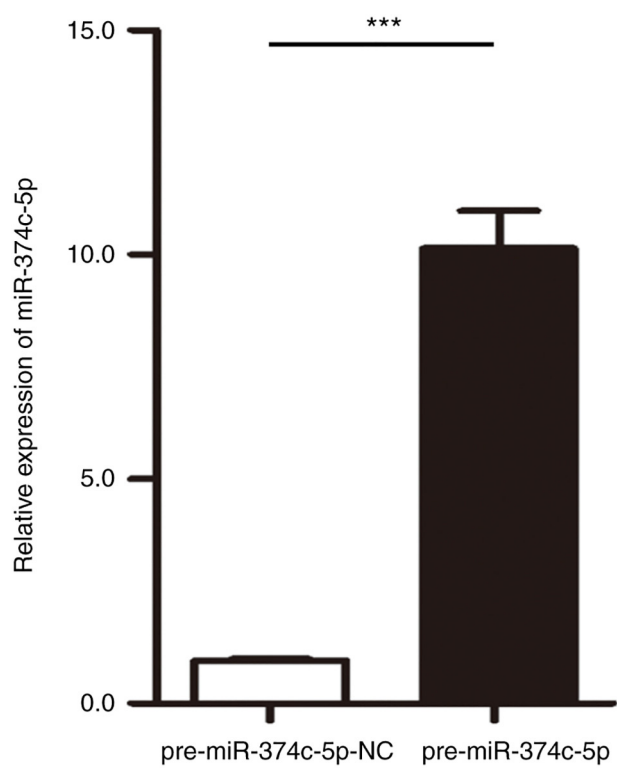

Supplement: Supplementary file 1 [file downloadSupplementary]
